# Supplementary material for: Analysis of m6A RNA Methylation-Related Genes in Liver Hepatocellular Carcinoma and Their Correlation with Survival
Source: MDPI journal article supplement (doi:10.3390/ijms22031474), 2021-02-02

Supplementary Figure S4

The difference expression of genes in clusters. The expression of the nine selected survival-related m6A RNA methylation related genes were significantly different

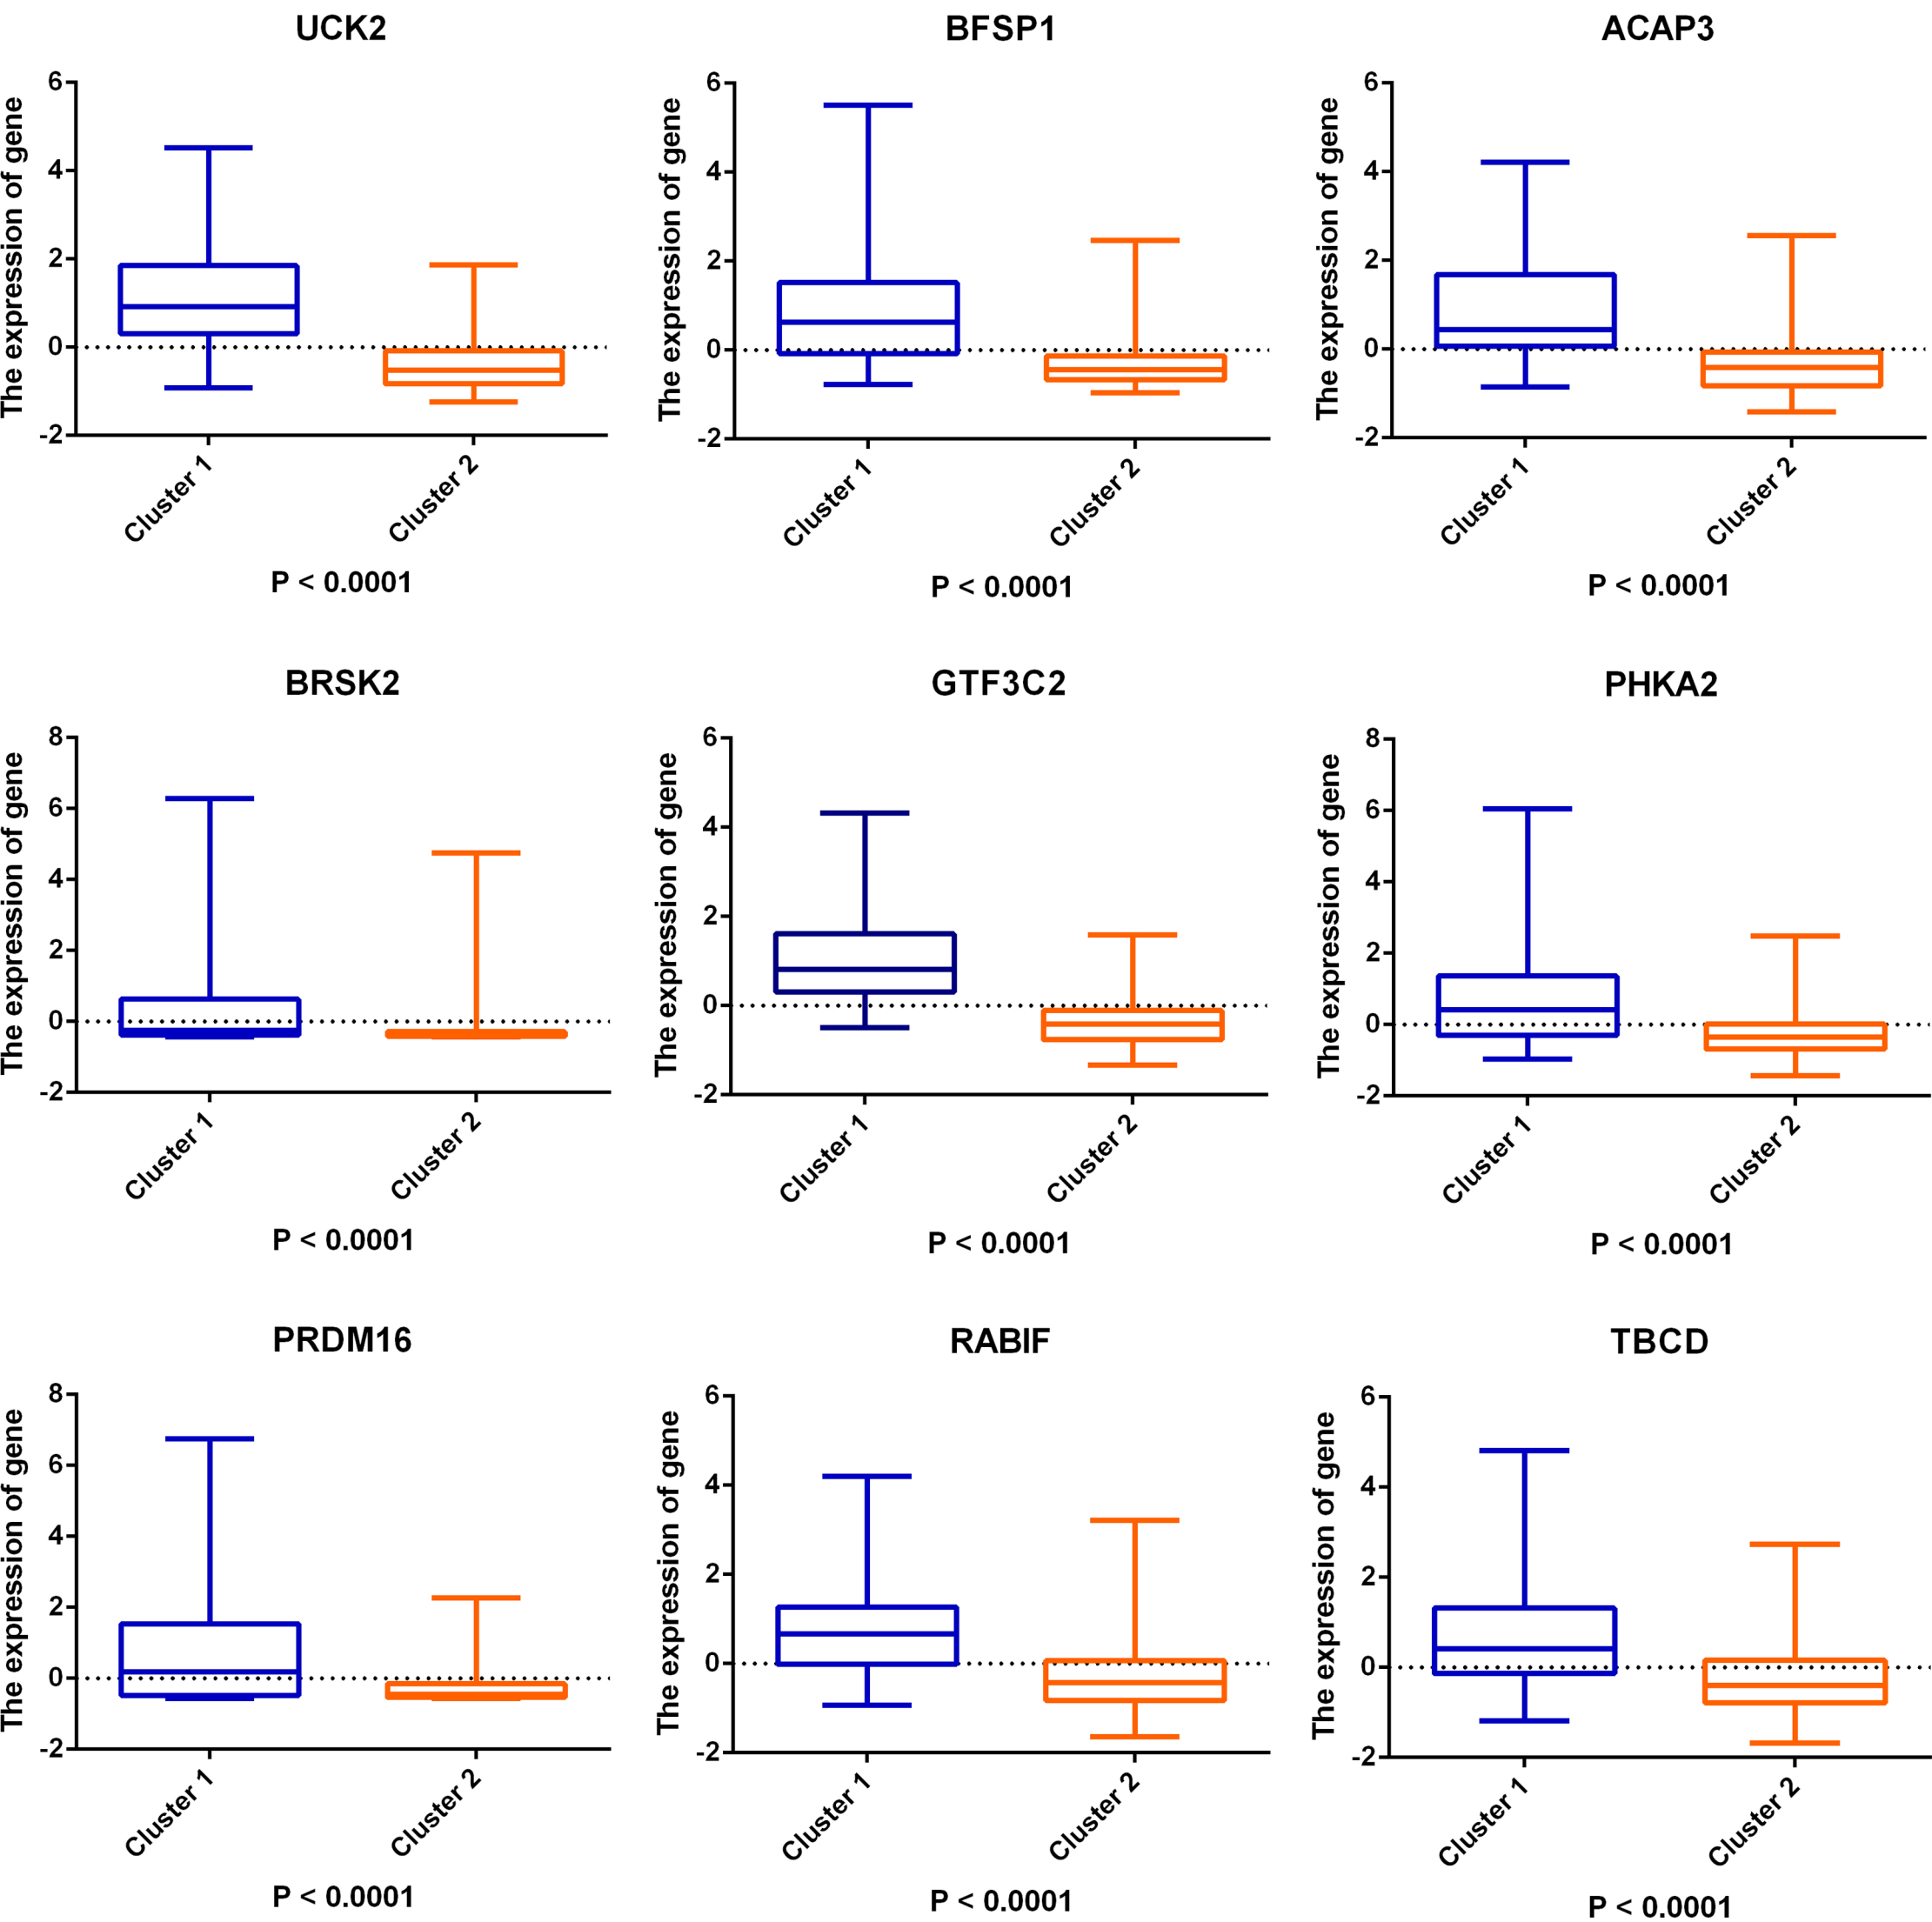

Supplement: s1 [file s1]
