# Supplementary material for: Analysis of m6A RNA Methylation-Related Genes in Liver Hepatocellular Carcinoma and Their Correlation with Survival
Source: MDPI journal article supplement (doi:10.3390/ijms22031474), 2021-02-02

Supplementary Figure S2

The KM curve described the significant survival difference between the high-risk group and the low-risk group of GSE76427.

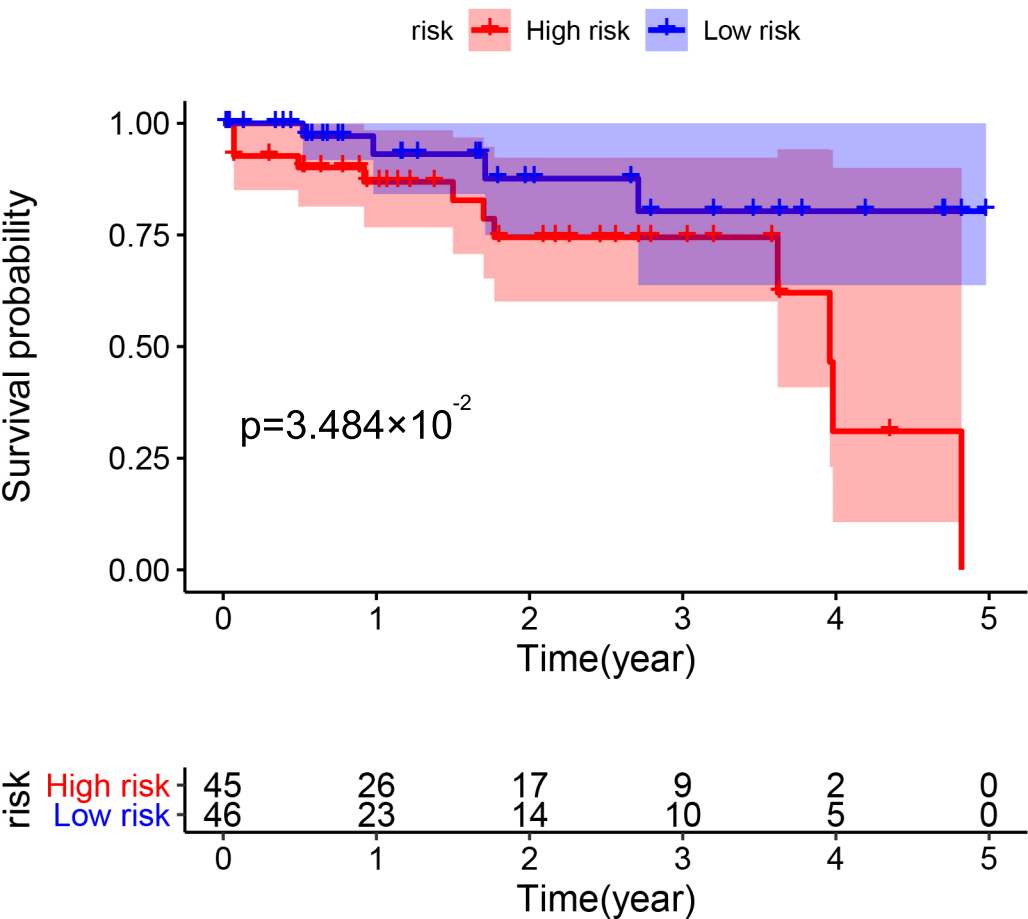

Supplement: s1 [file s1]
