# Supplementary material for: Analysis of m6A RNA Methylation-Related Genes in Liver Hepatocellular Carcinoma and Their Correlation with Survival
Source: MDPI journal article supplement (doi:10.3390/ijms22031474), 2021-02-02

Forest plot of the survival-related m6A RNA methylation related genes. The univariate analysis was performed to analyze the relationship between m6A RNA methylation related genes

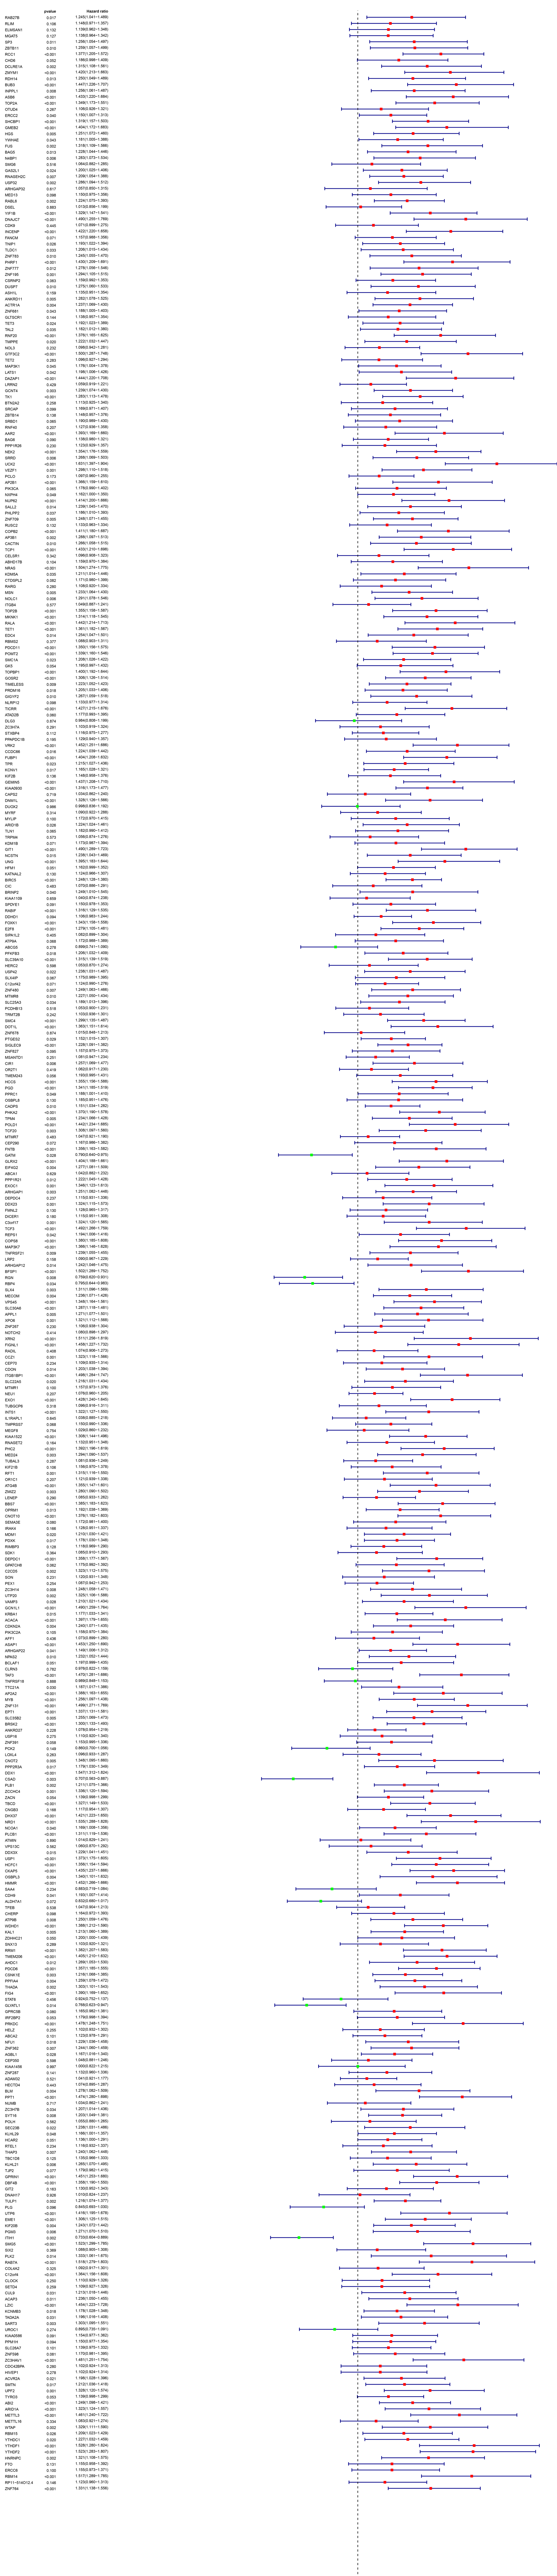

Supplement: s1 [file s1]
