# Supplementary material for: Analysis of m6A RNA Methylation-Related Genes in Liver Hepatocellular Carcinoma and Their Correlation with Survival
Source: MDPI journal article supplement (doi:10.3390/ijms22031474), 2021-02-02

Supplementary Figure S3

The clinical features were analyzed with the risk scores. Gender, AJCC stage, grade, T and N were significantly differed between the subgroup with high and low risk scores. Age and M were not significantly different between the high- and low-risk groups.

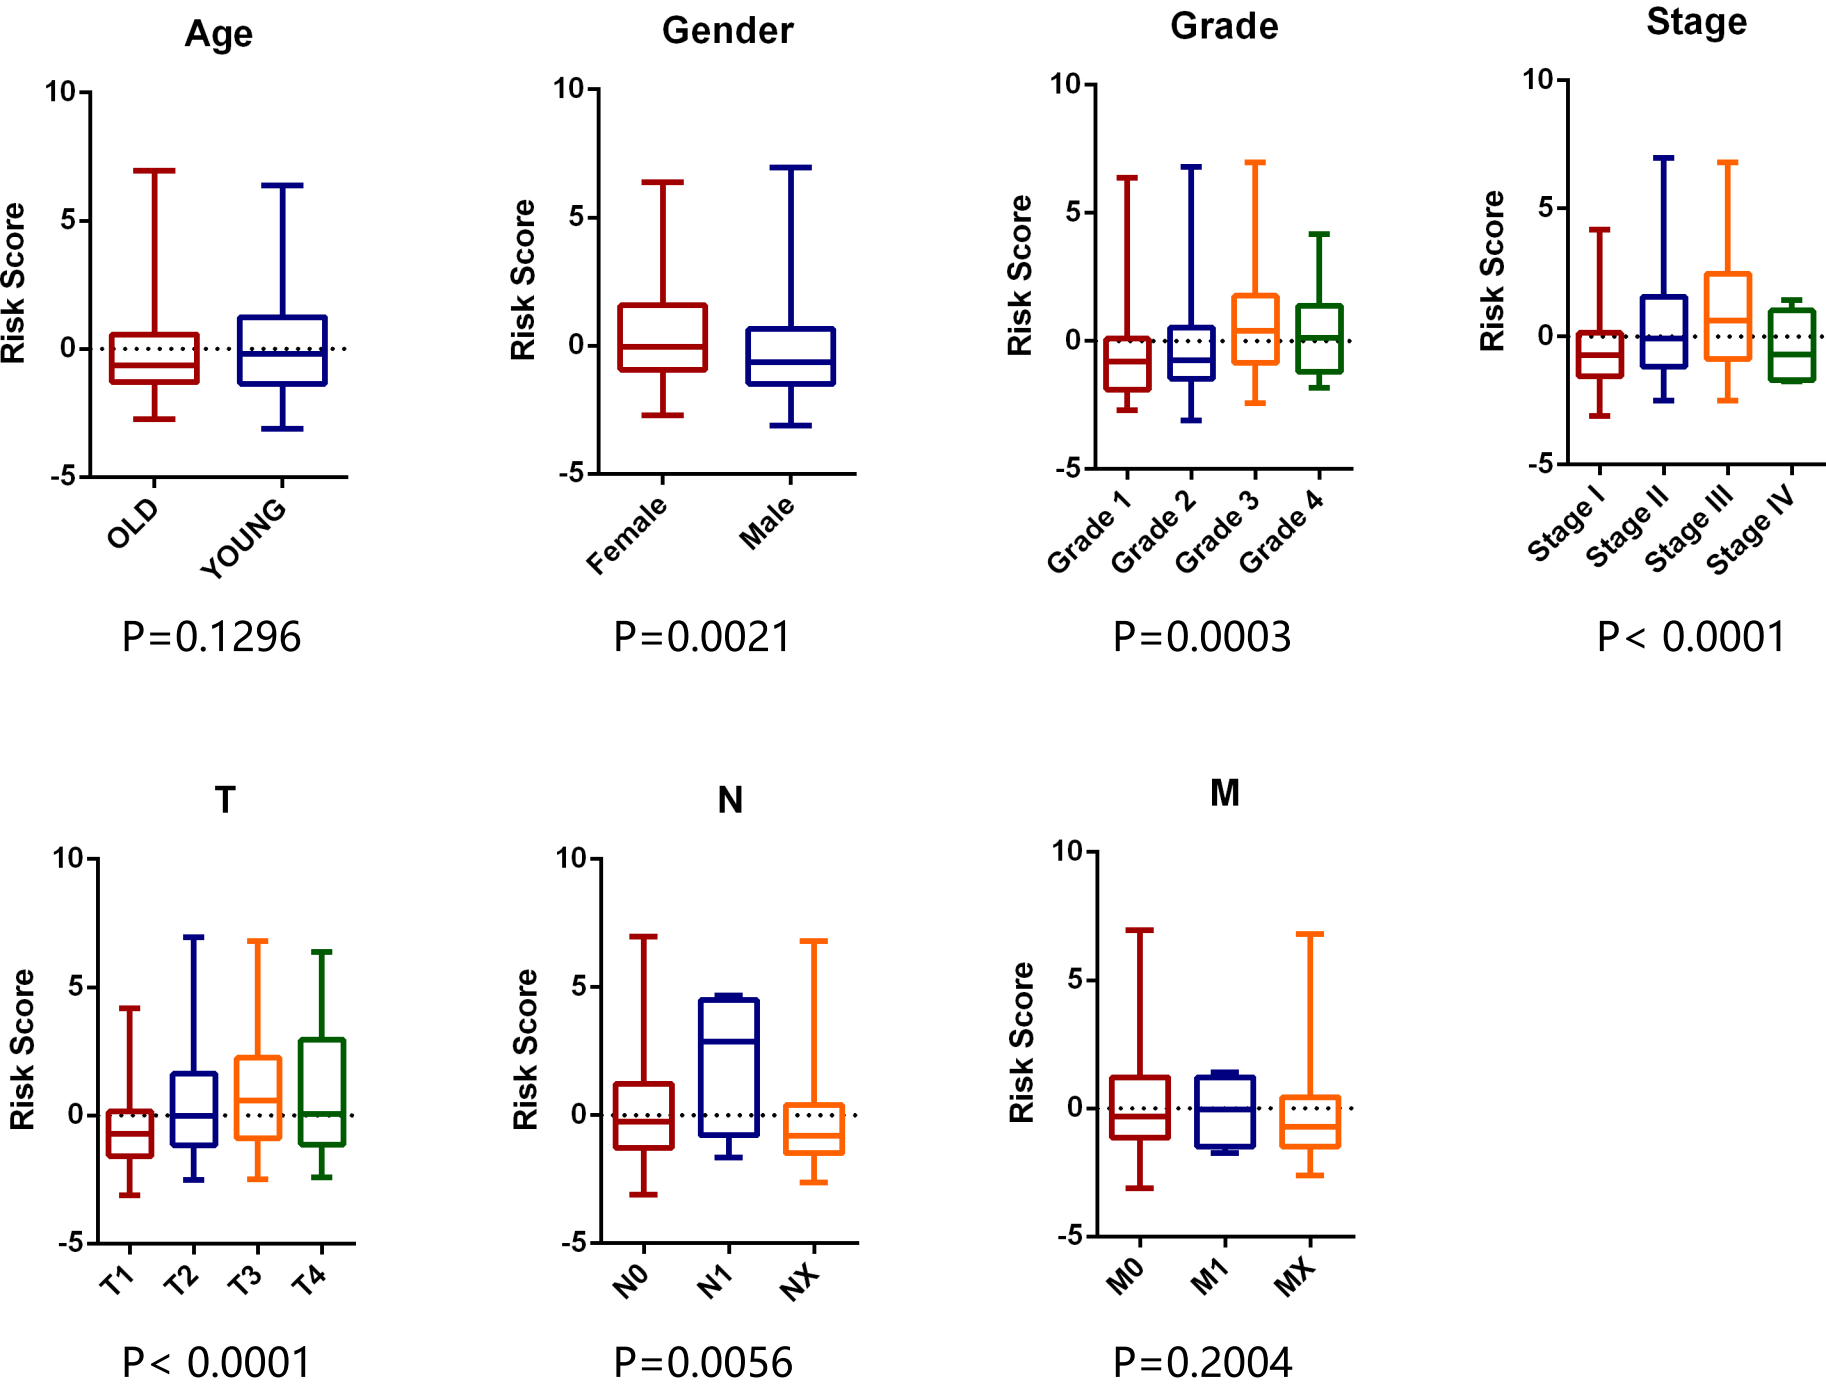

Supplement: s1 [file s1]
